# Supplementary material for: The Zn(II)2Cys6-Type Transcription Factor ADA-6 Regulates Conidiation, Sexual Development, and Oxidative Stress Response in Neurospora crassa
Source: Front Microbiol. 2019 Apr 10;10:750. doi: 10.3389/fmicb.2019.00750 (PMC6468284; doi:10.3389/fmicb.2019.00750)
Supplement: Supplementary file 3 [file Table_3.XLSX]

## Sheet: Sheet1
Supplementary Table S2
Table S2.Gene set enrichment analysis for differential expressed genes (DEGs) between the ada-6 deletion mutant and wild-type strain.
Go enrichment of DEGs at 0 hour
GO_accession	Description	Term_type	Over_represented_pValue	Corrected_pValue	DEG_item	DEG_list	Bg_item	Bg_list	Up	Up_Gene_names	Down	Down_Gene_names
GO:0071554	cell wall organization or biogenesis	biological_process	2.7986e-05	0.091	4	42	29	6710	4	NCU07033,NCU05317,NCU09904,NCU05319	0
GO:0016998	cell wall macromolecule catabolic process	biological_process	4.8059e-05	0.091	3	42	12	6710	3	NCU07033,NCU05317,NCU05319	0
GO:0044036	cell wall macromolecule metabolic process	biological_process	9.9317e-05	0.12537	3	42	15	6710	3	NCU07033,NCU05319,NCU05317	0
GO:0005199	structural constituent of cell wall	molecular_function	0.00022699	0.2149	2	42	4	6710	1	NCU07569	1	NCU08457
GO:0030312	external encapsulating structure	cellular_component	0.0033187	1	3	42	48	6710	2	NCU02344,NCU07569	1	NCU08457
Go enrichment of DEGs at 12 hour
GO_accession	Description	Term_type	Over_represented_pValue	Corrected_pValue	DEG_item	DEG_list	Bg_item	Bg_list	Up	Up_Gene_names	Down	Down_Gene_names
GO:0030246	carbohydrate binding	molecular_function	3.483e-06	0.01319	9	155	52	6710	8	NCU05159,NCU07225,NCU04997,NCU01517,NCU08746,NCU05598,NCU07609,NCU07760	1	NCU05153
GO:0001871	pattern binding	molecular_function	6.9226e-05	0.087387	6	155	29	6710	6	NCU07760,NCU07225,NCU05159,NCU08746,NCU01517,NCU04997	0
GO:0030247	polysaccharide binding	molecular_function	6.9226e-05	0.087387	6	155	29	6710	6	NCU04997,NCU08746,NCU01517,NCU05159,NCU07225,NCU07760	0
GO:0055114	oxidation-reduction process	biological_process	0.00016527	0.15647	36	155	818	6710	30	NCU01652,NCU05969,NCU05883,NCU00829,NCU09559,NCU07819,NCU05887,NCU04433,NCU10015,NCU01754,NCU07821,NCU05888,NCU09800,NCU08269,NCU01057,NCU06402,NCU01546,NCU04817,NCU02110,NCU07610,NCU02020,NCU05885,NCU04983,NCU06080,NCU00355,NCU02603,NCU02196,NCU09798,NCU10051,NCU00904	6	NCU06137,NCU09210,NCU08856,NCU05153,NCU04924,NCU05858
GO:0016491	oxidoreductase activity	molecular_function	0.00026253	0.17471	38	155	892	6710	30	NCU09798,NCU02196,NCU10051,NCU00904,NCU02603,NCU05885,NCU02020,NCU06080,NCU04983,NCU00355,NCU01057,NCU06402,NCU01546,NCU02110,NCU07610,NCU04817,NCU07821,NCU09800,NCU05888,NCU08269,NCU04433,NCU05887,NCU01754,NCU10015,NCU00829,NCU05883,NCU05969,NCU09559,NCU07819,NCU01652	8	NCU05858,NCU04924,NCU08856,NCU05153,NCU04862,NCU08057,NCU09210,NCU06137
GO:0005342	organic acid transmembrane transporter activity	molecular_function	0.00036908	0.17471	5	155	29	6710	5	NCU04942,NCU05886,NCU03960,NCU07754,NCU03509	0
GO:0008514	organic anion transmembrane transporter activity	molecular_function	0.00036908	0.17471	5	155	29	6710	5	NCU07754,NCU03509,NCU04942,NCU03960,NCU05886	0
GO:0046943	carboxylic acid transmembrane transporter activity	molecular_function	0.00036908	0.17471	5	155	29	6710	5	NCU04942,NCU05886,NCU03960,NCU07754,NCU03509	0
GO:0008509	anion transmembrane transporter activity	molecular_function	0.00048031	0.2021	7	155	62	6710	7	NCU07754,NCU03509,NCU04942,NCU04433,NCU03960,NCU01055,NCU05886	0
GO:0004553	hydrolase activity, hydrolyzing O-glycosyl compounds	molecular_function	0.00060659	0.22972	13	155	204	6710	11	NCU04265,NCU09326,NCU07760,NCU04674,NCU07225,NCU05159,NCU04928,NCU00972,NCU04997,NCU01517,NCU07609	2	NCU08755,NCU02184
GO:0016798	hydrolase activity, acting on glycosyl bonds	molecular_function	0.00095738	0.3296	13	155	213	6710	11	NCU05159,NCU07225,NCU04928,NCU04997,NCU00972,NCU01517,NCU07609,NCU04265,NCU09326,NCU07760,NCU04674	2	NCU08755,NCU02184
GO:0016705	oxidoreductase activity, acting on paired donors, with incorporation or reduction of molecular oxygen	molecular_function	0.0028605	0.85105	10	155	145	6710	8	NCU10015,NCU02603,NCU05883,NCU07821,NCU09798,NCU05885,NCU05888,NCU09559	2	NCU06137,NCU05153
GO:0030248	cellulose binding	molecular_function	0.0030287	0.85105	4	155	24	6710	4	NCU07225,NCU05159,NCU04997,NCU07760	0
GO:0055085	transmembrane transport	biological_process	0.0032813	0.85105	24	155	589	6710	21	NCU07820,NCU00830,NCU00801,NCU05884,NCU06040,NCU01633,NCU04942,NCU07754,NCU09698,NCU05886,NCU07609,NCU10512,NCU04490,NCU09039,NCU05897,NCU03509,NCU09678,NCU07894,NCU01231,NCU04963,NCU01095	3	NCU08325,NCU02184,NCU06255
GO:2001070	starch binding	molecular_function	0.0033709	0.85105	2	155	4	6710	2	NCU08746,NCU01517	0
GO:0004601	peroxidase activity	molecular_function	0.0039742	0.88531	3	155	16	6710	1	NCU00355	2	NCU09210,NCU05858
GO:0016684	oxidoreductase activity, acting on peroxide as acceptor	molecular_function	0.0039742	0.88531	3	155	16	6710	1	NCU00355	2	NCU05858,NCU09210
GO:0022857	transmembrane transporter activity	molecular_function	0.0049859	1	25	155	649	6710	21	NCU04433,NCU04490,NCU09428,NCU10512,NCU04963,NCU03960,NCU01055,NCU01095,NCU01231,NCU03509,NCU04942,NCU01633,NCU09702,NCU00830,NCU06040,NCU00801,NCU00829,NCU05886,NCU07609,NCU07819,NCU07754	4	NCU10055,NCU06255,NCU02184,NCU08325
Go enrichment of DEGs at 24 hour
GO_accession	Description	Term_type	Over_represented_pValue	Corrected_pValue	DEG_item	DEG_list	Bg_item	Bg_list	Up	Up_Gene_names	Down	Down_Gene_names
GO:0016491	oxidoreductase activity	molecular_function	1.7133e-09	6.4881e-06	247	1361	892	6710	119	NCU10572,NCU03526,NCU02918,NCU07241,NCU02920,NCU04419,NCU02179,NCU01386,NCU05400,NCU04591,NCU02925,NCU00269,NCU00835,NCU00973,NCU07920,NCU02020,NCU11046,NCU02172,NCU02922,NCU08825,NCU10031,NCU08272,NCU08750,NCU10387,NCU01954,NCU01528,NCU03714,NCU09023,NCU00955,NCU06717,NCU05133,NCU03651,NCU09278,NCU16942,NCU07953,NCU09735,NCU09088,NCU06402,NCU06042,NCU03646,NCU10775,NCU05535,NCU10011,NCU07452,NCU…	128	NCU01089,NCU00943,NCU02018,NCU09357,NCU00720,NCU01652,NCU08974,NCU05888,NCU03416,NCU10015,NCU08931,NCU01068,NCU01092,NCU08315,NCU07162,NCU02287,NCU06416,NCU03188,NCU07307,NCU11395,NCU08791,NCU07386,NCU06232,NCU00790,NCU01399,NCU06153,NCU09579,NCU02031,NCU02595,NCU10034,NCU04592,NCU11196,NCU01195,NCU09637,NCU05275,NCU04862,NCU11195,NCU03350,NCU00929,NCU00552,NCU09794,NCU09210,NCU04698,NCU08669,NCU…
GO:0016209	antioxidant activity	molecular_function	2.337e-08	4.4251e-05	21	1361	32	6710	12	NCU03714,NCU03646,NCU03651,NCU00598,NCU00355,NCU08114,NCU09534,NCU16942,NCU03297,NCU06556,NCU11046,NCU05770	9	NCU09210,NCU08931,NCU08791,NCU07386,NCU04268,NCU05169,NCU01213,NCU05858,NCU06880
GO:0055114	oxidation-reduction process	biological_process	2.1526e-06	0.0027172	218	1361	818	6710	107	NCU09901,NCU06924,NCU08114,NCU01789,NCU09602,NCU01720,NCU04452,NCU00987,NCU05338,NCU02475,NCU02936,NCU00884,NCU05001,NCU08927,NCU07851,NCU08352,NCU06399,NCU02396,NCU09285,NCU00461,NCU09559,NCU10232,NCU01206,NCU04857,NCU05770,NCU01294,NCU07242,NCU02110,NCU09163,NCU07053,NCU06303,NCU02927,NCU00355,NCU07988,NCU02926,NCU01554,NCU03045,NCU07017,NCU06895,NCU07561,NCU05499,NCU03297,NCU00741,NCU08900,NCU…	111	NCU04108,NCU07690,NCU07362,NCU05858,NCU05850,NCU05298,NCU00964,NCU03893,NCU02850,NCU03935,NCU06550,NCU01632,NCU07987,NCU16323,NCU09545,NCU04865,NCU05887,NCU08856,NCU00864,NCU04474,NCU09497,NCU05185,NCU00360,NCU08044,NCU02209,NCU09800,NCU00936,NCU02852,NCU07610,NCU01057,NCU01439,NCU05169,NCU01213,NCU01853,NCU00891,NCU02196,NCU08784,NCU02097,NCU07117,NCU01412,NCU09931,NCU03657,NCU08128,NCU00963,NCU…
GO:0004601	peroxidase activity	molecular_function	6.8641e-06	0.0046981	12	1361	16	6710	8	NCU09534,NCU03646,NCU16942,NCU00355,NCU03297,NCU11046,NCU05770,NCU08114	4	NCU08791,NCU09210,NCU05169,NCU05858
GO:0016684	oxidoreductase activity, acting on peroxide as acceptor	molecular_function	6.8641e-06	0.0046981	12	1361	16	6710	8	NCU08114,NCU05770,NCU11046,NCU03297,NCU16942,NCU00355,NCU03646,NCU09534	4	NCU05858,NCU05169,NCU09210,NCU08791
GO:0044710	single-organism metabolic process	biological_process	7.4436e-06	0.0046981	383	1361	1564	6710	188	NCU00973,NCU00269,NCU01386,NCU05400,NCU04591,NCU05648,NCU00173,NCU06406,NCU03710,NCU02920,NCU05363,NCU10572,NCU03526,NCU08056,NCU05133,NCU03336,NCU01528,NCU00599,NCU03359,NCU04327,NCU09492,NCU02020,NCU07920,NCU10775,NCU02502,NCU06332,NCU00913,NCU01279,NCU06033,NCU06003,NCU00322,NCU16942,NCU07872,NCU01157,NCU00321,NCU01193,NCU09169,NCU06447,NCU07326,NCU07452,NCU03006,NCU02692,NCU02475,NCU08927,NCU…	195	NCU06549,NCU02287,NCU07162,NCU01104,NCU00177,NCU05888,NCU08670,NCU02513,NCU01089,NCU07010,NCU02979,NCU02018,NCU06153,NCU00150,NCU00790,NCU00751,NCU07386,NCU06687,NCU02571,NCU06348,NCU08791,NCU04216,NCU01258,NCU11395,NCU07307,NCU03188,NCU09210,NCU02629,NCU09794,NCU11195,NCU03350,NCU09637,NCU04592,NCU10034,NCU03963,NCU03639,NCU04787,NCU06062,NCU02302,NCU05548,NCU00187,NCU05882,NCU06013,NCU03194,NCU…
GO:0006790	sulfur compound metabolic process	biological_process	0.00015926	0.086159	20	1361	44	6710	8	NCU11187,NCU01294,NCU02706,NCU08434,NCU00321,NCU01157,NCU08272,NCU06191	12	NCU10020,NCU06261,NCU06550,NCU09896,NCU02513,NCU01753,NCU16472,NCU00187,NCU09545,NCU08439,NCU02657,NCU07690
GO:1901605	alpha-amino acid metabolic process	biological_process	0.00021775	0.10308	39	1361	111	6710	16	NCU05499,NCU04856,NCU08434,NCU02706,NCU02798,NCU06303,NCU00321,NCU07872,NCU08272,NCU01789,NCU07080,NCU01528,NCU02920,NCU01294,NCU02936,NCU02475	23	NCU04648,NCU07362,NCU04539,NCU00751,NCU08409,NCU02274,NCU10468,NCU09545,NCU00187,NCU08287,NCU07987,NCU09930,NCU00790,NCU00150,NCU07690,NCU06714,NCU06550,NCU10020,NCU00963,NCU09320,NCU02325,NCU01652,NCU09931
GO:0003824	catalytic activity	molecular_function	0.0002729	0.1117	791	1361	3579	6710	391	NCU10775,NCU06762,NCU06332,NCU00913,NCU01388,NCU09735,NCU00321,NCU07872,NCU09810,NCU09169,NCU03886,NCU01193,NCU00275,NCU02923,NCU06832,NCU07326,NCU07281,NCU03097,NCU09326,NCU03238,NCU04166,NCU03006,NCU03899,NCU03538,NCU00973,NCU04591,NCU05400,NCU00269,NCU05995,NCU10046,NCU06406,NCU09904,NCU02940,NCU08056,NCU06781,NCU02481,NCU01528,NCU01013,NCU11356,NCU01369,NCU02020,NCU07920,NCU09906,NCU03216,NCU…	400	NCU09210,NCU02257,NCU09794,NCU00251,NCU02629,NCU09637,NCU00929,NCU11195,NCU06300,NCU09228,NCU00585,NCU03703,NCU09805,NCU10883,NCU03639,NCU06062,NCU09756,NCU07308,NCU05882,NCU03645,NCU06013,NCU00116,NCU10477,NCU08648,NCU02124,NCU08626,NCU06727,NCU07021,NCU01883,NCU03565,NCU08935,NCU05260,NCU01705,NCU01104,NCU04472,NCU00726,NCU06252,NCU01162,NCU02513,NCU06486,NCU05309,NCU08487,NCU05569,NCU00790,NCU…
GO:0044283	small molecule biosynthetic process	biological_process	0.00030943	0.1117	56	1361	178	6710	25	NCU06402,NCU06406,NCU00322,NCU02918,NCU02936,NCU05266,NCU08927,NCU02692,NCU03492,NCU07188,NCU03970,NCU03537,NCU01554,NCU09142,NCU03905,NCU04856,NCU08434,NCU02706,NCU06303,NCU01157,NCU00321,NCU06191,NCU07080,NCU08272,NCU01528	31	NCU04801,NCU06550,NCU10020,NCU10034,NCU09320,NCU00963,NCU05420,NCU02325,NCU03813,NCU02513,NCU06549,NCU07408,NCU02657,NCU09931,NCU01104,NCU11195,NCU04648,NCU06449,NCU06261,NCU02571,NCU07362,NCU04539,NCU03748,NCU00751,NCU01439,NCU10468,NCU09930,NCU01632,NCU00150,NCU00790,NCU06013
GO:0006082	organic acid metabolic process	biological_process	0.00033279	0.1117	89	1361	309	6710	38	NCU01554,NCU03045,NCU09142,NCU03905,NCU07326,NCU03500,NCU05499,NCU07360,NCU06303,NCU01157,NCU00321,NCU07872,NCU06191,NCU07080,NCU06402,NCU07082,NCU06761,NCU08280,NCU03492,NCU04856,NCU08434,NCU02706,NCU02798,NCU06924,NCU01789,NCU08272,NCU01528,NCU02920,NCU00461,NCU04406,NCU02918,NCU04857,NCU01294,NCU04591,NCU02925,NCU02936,NCU08927,NCU02475	51	NCU09049,NCU06727,NCU06449,NCU04539,NCU08409,NCU03748,NCU01439,NCU01753,NCU00466,NCU08287,NCU09545,NCU00187,NCU09930,NCU01632,NCU07987,NCU01443,NCU06013,NCU10034,NCU10020,NCU00963,NCU00931,NCU02325,NCU05642,NCU03813,NCU05069,NCU01195,NCU09931,NCU03347,NCU11195,NCU04648,NCU02571,NCU07362,NCU00751,NCU02274,NCU01258,NCU10468,NCU00790,NCU00150,NCU07690,NCU06714,NCU04801,NCU06550,NCU09320,NCU03935,NCU…
GO:0016053	organic acid biosynthetic process	biological_process	0.00041766	0.1117	44	1361	132	6710	18	NCU06402,NCU02918,NCU02936,NCU08927,NCU03492,NCU01554,NCU09142,NCU03905,NCU04856,NCU08434,NCU02706,NCU06303,NCU00321,NCU01157,NCU06191,NCU07080,NCU08272,NCU01528	26	NCU04801,NCU06550,NCU10034,NCU10020,NCU09320,NCU00963,NCU05420,NCU02325,NCU03813,NCU02657,NCU09931,NCU11195,NCU04648,NCU06449,NCU02571,NCU04539,NCU07362,NCU03748,NCU00751,NCU01439,NCU10468,NCU09930,NCU01632,NCU00790,NCU00150,NCU06013
GO:0046394	carboxylic acid biosynthetic process	biological_process	0.00041766	0.1117	44	1361	132	6710	18	NCU06402,NCU02918,NCU08927,NCU02936,NCU03492,NCU03905,NCU09142,NCU01554,NCU04856,NCU02706,NCU08434,NCU06303,NCU01157,NCU00321,NCU08272,NCU07080,NCU06191,NCU01528	26	NCU10020,NCU10034,NCU06550,NCU04801,NCU00963,NCU09320,NCU03813,NCU02325,NCU05420,NCU02657,NCU09931,NCU11195,NCU06449,NCU02571,NCU04648,NCU00751,NCU03748,NCU07362,NCU04539,NCU01439,NCU10468,NCU01632,NCU09930,NCU00150,NCU00790,NCU06013
GO:0019752	carboxylic acid metabolic process	biological_process	0.00044244	0.1117	88	1361	307	6710	38	NCU07360,NCU03500,NCU05499,NCU09142,NCU01554,NCU03045,NCU07326,NCU03905,NCU07080,NCU06191,NCU07872,NCU01157,NCU00321,NCU06303,NCU06761,NCU06402,NCU07082,NCU03492,NCU08280,NCU02706,NCU08434,NCU04856,NCU01528,NCU01789,NCU08272,NCU02798,NCU06924,NCU04857,NCU02918,NCU01294,NCU04406,NCU00461,NCU02920,NCU02475,NCU02936,NCU04591,NCU02925,NCU08927	50	NCU00466,NCU01439,NCU01753,NCU08409,NCU03748,NCU04539,NCU09049,NCU06449,NCU06727,NCU01443,NCU06013,NCU09930,NCU07987,NCU01632,NCU08287,NCU09545,NCU00187,NCU05069,NCU02325,NCU05642,NCU00931,NCU03813,NCU00963,NCU10034,NCU10020,NCU03347,NCU11195,NCU01195,NCU09931,NCU02274,NCU00751,NCU07362,NCU02571,NCU04648,NCU06714,NCU07690,NCU00790,NCU00150,NCU10468,NCU00720,NCU01652,NCU05420,NCU09320,NCU03935,NCU…
GO:0043436	oxoacid metabolic process	biological_process	0.00044244	0.1117	88	1361	307	6710	38	NCU02475,NCU08927,NCU02936,NCU04591,NCU02925,NCU00461,NCU02920,NCU01294,NCU02918,NCU04857,NCU04406,NCU06924,NCU02798,NCU01528,NCU08272,NCU01789,NCU02706,NCU08434,NCU04856,NCU08280,NCU03492,NCU06761,NCU07082,NCU06402,NCU07872,NCU00321,NCU01157,NCU06303,NCU07080,NCU06191,NCU07326,NCU03905,NCU09142,NCU01554,NCU03045,NCU07360,NCU05499,NCU03500	50	NCU03768,NCU06803,NCU08315,NCU02657,NCU03935,NCU09320,NCU06550,NCU04801,NCU00720,NCU01652,NCU05420,NCU10468,NCU06714,NCU07690,NCU00150,NCU00790,NCU00751,NCU07362,NCU02571,NCU04648,NCU02274,NCU11195,NCU03347,NCU09931,NCU01195,NCU00963,NCU10020,NCU10034,NCU05069,NCU03813,NCU05642,NCU02325,NCU00931,NCU07987,NCU01632,NCU09930,NCU00187,NCU09545,NCU08287,NCU06013,NCU01443,NCU08409,NCU03748,NCU04539,NCU…
GO:0006520	cellular amino acid metabolic process	biological_process	0.00055357	0.13102	65	1361	215	6710	24	NCU00461,NCU02920,NCU01294,NCU02918,NCU02475,NCU02936,NCU08434,NCU02706,NCU04856,NCU02798,NCU01528,NCU08272,NCU01789,NCU07082,NCU07326,NCU07360,NCU05499,NCU03500,NCU01157,NCU00321,NCU07872,NCU06303,NCU06191,NCU07080	41	NCU03935,NCU09320,NCU06550,NCU01652,NCU05420,NCU03768,NCU02657,NCU07362,NCU00751,NCU04648,NCU02274,NCU10468,NCU06714,NCU00790,NCU00150,NCU07690,NCU00963,NCU10020,NCU03813,NCU00931,NCU02325,NCU05642,NCU11195,NCU03347,NCU09931,NCU01195,NCU04539,NCU08409,NCU03748,NCU06727,NCU06449,NCU00466,NCU01753,NCU01439,NCU01632,NCU07987,NCU09930,NCU09545,NCU00187,NCU08287,NCU01443
GO:0044711	single-organism biosynthetic process	biological_process	0.0006384	0.14221	59	1361	195	6710	27	NCU06402,NCU06406,NCU00322,NCU02918,NCU08927,NCU05266,NCU02936,NCU02692,NCU06986,NCU03492,NCU07188,NCU03537,NCU03970,NCU03905,NCU09142,NCU01554,NCU04856,NCU02706,NCU08434,NCU06303,NCU00321,NCU01157,NCU08272,NCU07080,NCU06191,NCU01528,NCU07018	32	NCU10034,NCU10020,NCU06550,NCU04801,NCU00963,NCU09320,NCU02513,NCU03813,NCU02325,NCU05420,NCU06549,NCU09931,NCU02657,NCU07408,NCU11195,NCU01104,NCU06449,NCU02571,NCU06261,NCU04648,NCU00751,NCU03748,NCU04539,NCU07362,NCU01439,NCU10468,NCU01632,NCU09930,NCU02492,NCU00150,NCU00790,NCU06013
GO:0008652	cellular amino acid biosynthetic process	biological_process	0.00092741	0.18517	34	1361	99	6710	12	NCU02936,NCU02918,NCU08272,NCU07080,NCU06191,NCU01528,NCU06303,NCU00321,NCU01157,NCU04856,NCU02706,NCU08434	22	NCU02657,NCU09931,NCU11195,NCU03813,NCU02325,NCU05420,NCU10020,NCU06550,NCU00963,NCU09320,NCU00150,NCU00790,NCU10468,NCU01632,NCU09930,NCU01439,NCU06449,NCU04648,NCU03748,NCU00751,NCU04539,NCU07362
GO:0006979	response to oxidative stress	biological_process	0.00092902	0.18517	8	1361	12	6710	7	NCU16942,NCU03297,NCU05770,NCU03379,NCU08114,NCU09534,NCU03646	1	NCU05858
GO:0003674	molecular_function	molecular_function	0.0010169	0.19256	1226	1361	5838	6710	660	NCU02833,NCU06605,NCU03886,NCU09169,NCU02923,NCU00321,NCU04766,NCU10539,NCU07281,NCU04166,NCU09326,NCU07326,NCU07443,NCU05423,NCU07334,NCU09899,NCU08551,NCU02548,NCU06332,NCU06762,NCU07649,NCU10381,NCU09267,NCU06860,NCU01528,NCU02139,NCU04368,NCU01013,NCU08978,NCU02481,NCU10006,NCU00770,NCU02020,NCU11356,NCU10046,NCU05995,NCU00973,NCU03538,NCU03899,NCU00269,NCU05400,NCU06781,NCU08056,NCU02940,NCU…	566	NCU03699,NCU09043,NCU03565,NCU08648,NCU07021,NCU08626,NCU09210,NCU04552,NCU09677,NCU09794,NCU03639,NCU04813,NCU09756,NCU09228,NCU10883,NCU04312,NCU05585,NCU00790,NCU06486,NCU08960,NCU08791,NCU01104,NCU05599,NCU00726,NCU02513,NCU04472,NCU06965,NCU09992,NCU08287,NCU00713,NCU06035,NCU03921,NCU05185,NCU09497,NCU02802,NCU00939,NCU08128,NCU07408,NCU05859,NCU17268,NCU06005,NCU02244,NCU10020,NCU08093,NCU…
GO:0016627	oxidoreductase activity, acting on the CH-CH group of donors	molecular_function	0.0011889	0.2144	27	1361	75	6710	10	NCU01546,NCU01528,NCU07080,NCU08352,NCU08900,NCU07053,NCU05400,NCU02925,NCU01181,NCU03415	17	NCU04699,NCU02619,NCU09931,NCU01195,NCU00790,NCU02287,NCU02097,NCU00720,NCU03195,NCU07307,NCU01089,NCU08669,NCU01861,NCU07585,NCU04231,NCU06550,NCU08974
GO:0044272	sulfur compound biosynthetic process	biological_process	0.0014937	0.25711	11	1361	22	6710	6	NCU08272,NCU06191,NCU02706,NCU08434,NCU00321,NCU01157	5	NCU02657,NCU02513,NCU10020,NCU06261,NCU06550
GO:0048037	cofactor binding	molecular_function	0.0016005	0.26352	99	1361	369	6710	49	NCU08900,NCU01181,NCU08280,NCU06042,NCU06233,NCU06761,NCU02904,NCU06110,NCU09111,NCU09278,NCU09864,NCU09163,NCU03023,NCU06303,NCU09810,NCU09169,NCU02927,NCU01193,NCU02926,NCU08771,NCU05164,NCU07452,NCU05535,NCU03500,NCU00741,NCU04591,NCU02925,NCU00884,NCU03756,NCU02179,NCU08352,NCU09285,NCU08117,NCU03364,NCU04857,NCU07242,NCU03526,NCU10572,NCU09230,NCU00955,NCU03651,NCU05133,NCU06615,NCU06924,NCU…	50	NCU01853,NCU00891,NCU09794,NCU00552,NCU06346,NCU09637,NCU11195,NCU03347,NCU11196,NCU04592,NCU05885,NCU03195,NCU05069,NCU03813,NCU07987,NCU06360,NCU09545,NCU01704,NCU02619,NCU03194,NCU09050,NCU06189,NCU05185,NCU00360,NCU01439,NCU03565,NCU02287,NCU07162,NCU08411,NCU08315,NCU06803,NCU03973,NCU01092,NCU03893,NCU03416,NCU03935,NCU06550,NCU01652,NCU00720,NCU02018,NCU01089,NCU02677,NCU08998,NCU06153,NCU…
GO:1901564	organonitrogen compound metabolic process	biological_process	0.0017628	0.27804	158	1361	625	6710	74	NCU00322,NCU07188,NCU00436,NCU08742,NCU03238,NCU07326,NCU09142,NCU07080,NCU01157,NCU00321,NCU07872,NCU08056,NCU01250,NCU02918,NCU08468,NCU09830,NCU02920,NCU05363,NCU06406,NCU02051,NCU02211,NCU00173,NCU05266,NCU02925,NCU07024,NCU08434,NCU09492,NCU02706,NCU00701,NCU04327,NCU03719,NCU03359,NCU08272,NCU01013,NCU01528,NCU08750,NCU07082,NCU11187,NCU01767,NCU03282,NCU01546,NCU10893,NCU03216,NCU02830,NCU…	84	NCU00931,NCU03963,NCU00112,NCU05861,NCU01195,NCU11195,NCU02629,NCU05290,NCU01753,NCU03643,NCU00466,NCU06727,NCU04539,NCU08409,NCU03748,NCU08824,NCU03194,NCU08715,NCU00187,NCU06393,NCU05548,NCU02513,NCU07010,NCU01089,NCU01652,NCU00720,NCU09357,NCU08974,NCU00177,NCU01816,NCU06549,NCU03768,NCU01258,NCU04216,NCU00751,NCU00790,NCU00150,NCU03813,NCU07585,NCU01861,NCU05642,NCU02325,NCU10020,NCU08093,NCU…
GO:1901566	organonitrogen compound biosynthetic process	biological_process	0.0018355	0.27804	94	1361	350	6710	42	NCU00322,NCU01546,NCU03282,NCU07188,NCU03216,NCU02539,NCU03970,NCU09142,NCU07988,NCU07080,NCU06191,NCU07018,NCU06303,NCU01157,NCU08334,NCU00321,NCU01250,NCU09174,NCU02918,NCU08468,NCU04459,NCU05363,NCU02051,NCU06406,NCU08352,NCU00010,NCU05266,NCU06484,NCU02936,NCU02925,NCU07024,NCU02692,NCU04856,NCU02706,NCU08434,NCU03537,NCU04327,NCU03719,NCU03359,NCU08272,NCU01013,NCU01528	52	NCU03813,NCU01861,NCU02325,NCU07585,NCU10020,NCU08093,NCU00963,NCU09931,NCU05861,NCU07408,NCU01195,NCU11195,NCU02097,NCU02629,NCU03643,NCU01439,NCU04837,NCU06449,NCU03748,NCU04539,NCU08824,NCU03194,NCU06393,NCU01632,NCU05548,NCU08291,NCU09930,NCU02513,NCU01089,NCU09789,NCU07010,NCU05420,NCU00720,NCU09357,NCU03558,NCU02420,NCU06550,NCU06664,NCU00177,NCU09320,NCU02657,NCU02771,NCU08439,NCU06549,NCU…
GO:0000096	sulfur amino acid metabolic process	biological_process	0.0019834	0.28888	8	1361	13	6710	4	NCU00321,NCU01294,NCU02706,NCU08434	4	NCU00187,NCU10020,NCU09545,NCU07690
GO:0044281	small molecule metabolic process	biological_process	0.0035121	0.4926	148	1361	592	6710	68	NCU03492,NCU01767,NCU10893,NCU03282,NCU02830,NCU08280,NCU11187,NCU07082,NCU06761,NCU06191,NCU07988,NCU06303,NCU08334,NCU03330,NCU03500,NCU05499,NCU07360,NCU03970,NCU01554,NCU03045,NCU00010,NCU02936,NCU08927,NCU02475,NCU02692,NCU09174,NCU04857,NCU08811,NCU01294,NCU04459,NCU00461,NCU01789,NCU02798,NCU06924,NCU04856,NCU03890,NCU03537,NCU10009,NCU07188,NCU08742,NCU00322,NCU06402,NCU07080,NCU07872,NCU…	80	NCU02046,NCU09931,NCU07408,NCU03347,NCU02325,NCU05642,NCU03813,NCU05069,NCU08093,NCU10020,NCU05316,NCU00963,NCU01443,NCU08287,NCU09545,NCU09659,NCU09930,NCU07987,NCU01632,NCU01439,NCU04837,NCU06449,NCU08856,NCU05254,NCU02657,NCU06803,NCU08359,NCU09789,NCU05420,NCU03558,NCU06550,NCU09320,NCU03935,NCU06664,NCU07690,NCU04202,NCU04514,NCU06714,NCU10468,NCU02274,NCU06261,NCU04648,NCU07782,NCU07362,NCU…
Go enrichment of DEGs at 4 days
GO_accession	Description	Term_type	Over_represented_pValue	Corrected_pValue	DEG_item	DEG_list	Bg_item	Bg_list	Up	Up_Gene_names	Down	Down_Gene_names
GO:0016491	oxidoreductase activity	molecular_function	3.7476e-09	1.4192e-05	117	528	892	6710	42	NCU09733,NCU01824,NCU05832,NCU00876,NCU06061,NCU00835,NCU01754,NCU09103,NCU02988,NCU05969,NCU10387,NCU06402,NCU02110,NCU05188,NCU02020,NCU00829,NCU01904,NCU09406,NCU07966,NCU01720,NCU08114,NCU00700,NCU00355,NCU00790,NCU07737,NCU09497,NCU00552,NCU06416,NCU09719,NCU09533,NCU05850,NCU04983,NCU03151,NCU00987,NCU04025,NCU03287,NCU10344,NCU05278,NCU09798,NCU10775,NCU04456,NCU07811	75	NCU07080,NCU04539,NCU11286,NCU09041,NCU06080,NCU08402,NCU02923,NCU09210,NCU02948,NCU05133,NCU05038,NCU04936,NCU08974,NCU06018,NCU09800,NCU03339,NCU04791,NCU09050,NCU05169,NCU08057,NCU00057,NCU04823,NCU04077,NCU06005,NCU01066,NCU02690,NCU04416,NCU02926,NCU06804,NCU04433,NCU07267,NCU05069,NCU07452,NCU05888,NCU05887,NCU11395,NCU02922,NCU09403,NCU03608,NCU07920,NCU03651,NCU08699,NCU02920,NCU07610,NCU…
GO:0055114	oxidation-reduction process	biological_process	2.1241e-08	4.0219e-05	107	528	818	6710	41	NCU09733,NCU01824,NCU00876,NCU05832,NCU00835,NCU06061,NCU09103,NCU02988,NCU05969,NCU01754,NCU10387,NCU06402,NCU01904,NCU02110,NCU05188,NCU00829,NCU02020,NCU01720,NCU03318,NCU09406,NCU07966,NCU00700,NCU08114,NCU00355,NCU07737,NCU09497,NCU00790,NCU06416,NCU00552,NCU09719,NCU05850,NCU03151,NCU00987,NCU04983,NCU04025,NCU10344,NCU05278,NCU09798,NCU10775,NCU04456,NCU01789	66	NCU07080,NCU04539,NCU06080,NCU11286,NCU08402,NCU05133,NCU09210,NCU05038,NCU04936,NCU08974,NCU03339,NCU05169,NCU09050,NCU06018,NCU09800,NCU04823,NCU04077,NCU00057,NCU06005,NCU01066,NCU06804,NCU04416,NCU02690,NCU02926,NCU05069,NCU04433,NCU07267,NCU05888,NCU05887,NCU07452,NCU11395,NCU03608,NCU07610,NCU07920,NCU03651,NCU03697,NCU09163,NCU07819,NCU04924,NCU02133,NCU09040,NCU02918,NCU06153,NCU04575,NCU…
GO:0055085	transmembrane transport	biological_process	5.3011e-06	0.0066917	76	528	589	6710	42	NCU06358,NCU11342,NCU02879,NCU05897,NCU08225,NCU08397,NCU03789,NCU07621,NCU07068,NCU03471,NCU09874,NCU02464,NCU07338,NCU07175,NCU06132,NCU01231,NCU08114,NCU08439,NCU08407,NCU00700,NCU00790,NCU07894,NCU10276,NCU00809,NCU08490,NCU04963,NCU05079,NCU10021,NCU00648,NCU09909,NCU07140,NCU03509,NCU09613,NCU02875,NCU16370,NCU00886,NCU03621,NCU00830,NCU07262,NCU07736,NCU02184,NCU06918	34	NCU17268,NCU06255,NCU04117,NCU01095,NCU10314,NCU05784,NCU03098,NCU00755,NCU05039,NCU17269,NCU00589,NCU07065,NCU09831,NCU05157,NCU09678,NCU07918,NCU09654,NCU07921,NCU05585,NCU01633,NCU17136,NCU02773,NCU07607,NCU04568,NCU09887,NCU01494,NCU00227,NCU09458,NCU09799,NCU04942,NCU06860,NCU09069,NCU08738,NCU06847
GO:0004601	peroxidase activity	molecular_function	9.0503e-06	0.0068547	8	528	16	6710	3	NCU07966,NCU08114,NCU00355	5	NCU05858,NCU05169,NCU09210,NCU08791,NCU11286
GO:0016684	oxidoreductase activity, acting on peroxide as acceptor	molecular_function	9.0503e-06	0.0068547	8	528	16	6710	3	NCU08114,NCU00355,NCU07966	5	NCU09210,NCU08791,NCU11286,NCU05858,NCU05169
GO:0004096	catalase activity	molecular_function	3.089e-05	0.019497	4	528	4	6710	2	NCU00355,NCU07966	2	NCU05169,NCU08791
GO:0044765	single-organism transport	biological_process	0.00010577	0.057223	105	528	956	6710	50	NCU00700,NCU08407,NCU08439,NCU08114,NCU06132,NCU01231,NCU00790,NCU03471,NCU07068,NCU07621,NCU07175,NCU09874,NCU07338,NCU02464,NCU08397,NCU08225,NCU05897,NCU04373,NCU03789,NCU09428,NCU06358,NCU01291,NCU01824,NCU02879,NCU11342,NCU07262,NCU00830,NCU03621,NCU00886,NCU16370,NCU06918,NCU02184,NCU07736,NCU01789,NCU03509,NCU09613,NCU07140,NCU02875,NCU04963,NCU09909,NCU00648,NCU10021,NCU01065,NCU05079,NCU…	55	NCU06265,NCU05585,NCU08827,NCU07921,NCU09654,NCU07918,NCU02302,NCU17136,NCU01633,NCU08670,NCU06412,NCU06005,NCU09678,NCU06804,NCU05157,NCU08794,NCU02690,NCU04433,NCU09986,NCU07065,NCU09831,NCU00755,NCU03098,NCU00589,NCU17269,NCU05039,NCU04117,NCU06255,NCU00766,NCU17268,NCU05784,NCU10314,NCU01095,NCU10055,NCU04507,NCU08738,NCU09357,NCU06847,NCU09069,NCU04942,NCU09799,NCU06860,NCU09285,NCU03235,NCU…
GO:0016209	antioxidant activity	molecular_function	0.00012536	0.059343	10	528	32	6710	4	NCU00355,NCU03151,NCU08114,NCU07966	6	NCU11286,NCU03651,NCU09210,NCU08791,NCU05858,NCU05169
GO:0005215	transporter activity	molecular_function	0.00022248	0.093614	80	528	702	6710	41	NCU00790,NCU01231,NCU08114,NCU02691,NCU00700,NCU08439,NCU07338,NCU02464,NCU01720,NCU07175,NCU07621,NCU00829,NCU07068,NCU03789,NCU08225,NCU11342,NCU02879,NCU09428,NCU06358,NCU07432,NCU04456,NCU02184,NCU06918,NCU00886,NCU03621,NCU07262,NCU00830,NCU02875,NCU09613,NCU03509,NCU03287,NCU05079,NCU10021,NCU00648,NCU01065,NCU09909,NCU04963,NCU00809,NCU08148,NCU10276,NCU03960	39	NCU08670,NCU02302,NCU17136,NCU08056,NCU01633,NCU07918,NCU09654,NCU05585,NCU07921,NCU04433,NCU07065,NCU08794,NCU02690,NCU05157,NCU06005,NCU05039,NCU03098,NCU00755,NCU10055,NCU01095,NCU10314,NCU17268,NCU07945,NCU06255,NCU04117,NCU09069,NCU06847,NCU08738,NCU04507,NCU06860,NCU04942,NCU02927,NCU03235,NCU07819,NCU01494,NCU02931,NCU00227,NCU02773,NCU07607
GO:0008176	tRNA (guanine-N7-)-methyltransferase activity	molecular_function	0.0002965	0.11228	9	528	28	6710	7	NCU04904,NCU05841,NCU04909,NCU00401,NCU00304,NCU04910,NCU04905	2	NCU02502,NCU05764
GO:0016423	tRNA (guanine) methyltransferase activity	molecular_function	0.00051963	0.17889	9	528	30	6710	7	NCU04910,NCU04905,NCU05841,NCU04904,NCU04909,NCU00401,NCU00304	2	NCU02502,NCU05764
GO:0022857	transmembrane transporter activity	molecular_function	0.0010569	0.32466	72	528	649	6710	36	NCU03960,NCU10276,NCU08148,NCU00809,NCU04963,NCU01065,NCU10021,NCU00648,NCU03287,NCU03509,NCU09613,NCU02875,NCU00830,NCU07262,NCU03621,NCU00886,NCU02184,NCU04456,NCU06358,NCU09428,NCU02879,NCU11342,NCU08225,NCU03789,NCU07068,NCU00829,NCU07621,NCU07175,NCU01720,NCU07338,NCU02464,NCU08439,NCU00700,NCU08114,NCU01231,NCU00790	36	NCU02773,NCU07607,NCU00227,NCU01494,NCU02931,NCU07819,NCU03235,NCU04942,NCU06860,NCU04507,NCU06847,NCU09069,NCU04117,NCU06255,NCU07945,NCU17268,NCU10314,NCU01095,NCU10055,NCU00755,NCU03098,NCU05039,NCU06005,NCU05157,NCU02690,NCU08794,NCU07065,NCU04433,NCU07921,NCU05585,NCU09654,NCU07918,NCU08056,NCU01633,NCU02302,NCU17136
GO:0008175	tRNA methyltransferase activity	molecular_function	0.0011145	0.32466	9	528	33	6710	7	NCU04910,NCU04905,NCU04909,NCU05841,NCU04904,NCU00401,NCU00304	2	NCU02502,NCU05764
GO:0044710	single-organism metabolic process	biological_process	0.0020612	0.55755	151	528	1564	6710	58	NCU09103,NCU03006,NCU06061,NCU00835,NCU04373,NCU09244,NCU01824,NCU00876,NCU09733,NCU07737,NCU08114,NCU00346,NCU08439,NCU09245,NCU01720,NCU03318,NCU06402,NCU05188,NCU02110,NCU01904,NCU03922,NCU04025,NCU03151,NCU00987,NCU09719,NCU01789,NCU04456,NCU05278,NCU10775,NCU04856,NCU01427,NCU10344,NCU06062,NCU01754,NCU05969,NCU02988,NCU09855,NCU03605,NCU05832,NCU11405,NCU00790,NCU09497,NCU00552,NCU06416,NCU…	93	NCU08974,NCU09800,NCU06603,NCU05169,NCU09210,NCU05038,NCU04936,NCU08402,NCU02502,NCU04539,NCU11286,NCU08056,NCU05887,NCU05888,NCU09654,NCU00281,NCU01210,NCU07267,NCU00057,NCU06005,NCU05040,NCU00884,NCU02925,NCU00136,NCU06803,NCU03348,NCU02927,NCU02918,NCU09163,NCU02133,NCU07920,NCU03697,NCU09357,NCU07919,NCU04865,NCU09794,NCU08298,NCU05882,NCU02046,NCU04108,NCU07318,NCU09285,NCU06332,NCU06018,NCU…
